# Supplementary material
Source: MDPI journal article supplement (https://www.mdpi.com/2073-4441/14/13/2092)
Supplement: s1 [file s1]

## Supplementary Materials

**Table S1.** Flux and feed solution conductivity for the experiments with NaCl draw solution without ultrasound. Notes: Time in min, flux in L/m<sup>2</sup>.h, and conductivity of feed solution (Cond FS) in mS/cm

| Case: 0.25-C-BL |       |         |        |      |         | Case: 1.0-C-BL |       |         |        |       |         |
|-----------------|-------|---------|--------|------|---------|----------------|-------|---------|--------|-------|---------|
| Run #1          |       |         | Run #2 |      |         | Run #1         |       |         | Run #2 |       |         |
| Time            | Flux  | Cond FS | Time   | Flux | Cond FS | Time           | Flux  | Cond FS | Time   | Flux  | Cond FS |
| 20              | 9.37  | 76.5    | 20     | 8.52 | 73.9    | 20             | 16.7  | 74.9    | 20     | 15.69 | 77.7    |
| 30              | 4.58  | 78.2    | 30     | 7.9  | 74.3    | 30             | 15.9  | 75.7    | 30     | 15.25 | 78.5    |
| 40              | 10.06 | 79.2    | 40     | 7.41 | 74.7    | 40             | 16.17 | 76.8    | 40     | 14.99 | 79.5    |
| 50              | 9.99  | 79.7    | 50     | 8.74 | 75.2    | 50             | 15.22 | 77.7    | 50     | 14.9  | 80.3    |
| 60              | 9.07  | 80.1    | 60     | 6.75 | 75.8    | 60             | 15.4  | 78.7    | 60     | 14.83 | 81.5    |
| 70              | 8.32  | 80.6    | 70     | 7.59 | 76.1    | 70             | 14.23 | 79.8    | 70     | 14.01 | 82.4    |
| 80              | 9.67  | 81.4    | 80     | 7.41 | 76.6    | 80             | 14.81 | 80.6    | 80     | 14.11 | 83.4    |
| 90              | 9.21  | 82      | 90     | 6.2  | 76.9    | 90             | 14.07 | 81.7    | 90     | 14.22 | 84.5    |
| 100             | 8.11  | 82.9    | 100    | 6.63 | 77.4    | 100            | 13.95 | 82.7    | 100    | 13.83 | 85.4    |
| 110             | 8.38  | 83.5    | 110    | 6.8  | 78      | 110            | 13.83 | 83.7    | 110    | 13.56 | 86.6    |
| 120             | 8.65  | 83.8    | 120    | 6.42 | 78.5    | 120            | 13.21 | 84.8    | 120    | 13.63 | 87.7    |
| 130             | 8.52  | 84.8    | 130    | 7.65 | 79.1    | 130            | 14.07 | 85.6    | 130    | 12.88 | 88.2    |
| 140             | 8.27  | 85.1    | 140    | 6.54 | 79.5    | 140            | 13.21 | 86.4    | 140    | 12.68 | 89.3    |

| Case: 0.25-CC-BL |      |         |        |      |         | Case: 1.0-CC-BL |       |         |        |       |         |
|------------------|------|---------|--------|------|---------|-----------------|-------|---------|--------|-------|---------|
| Run #1           |      |         | Run #2 |      |         | Run #1          |       |         | Run #2 |       |         |
| Time             | Flux | Cond FS | Time   | Flux | Cond FS | Time            | Flux  | Cond FS | Time   | Flux  | Cond FS |
| 20               | 7.64 | 74.2    | 20     | 7.01 | 72.9    | 20              | 14.41 | 77.5    | 20     | 13.33 | 76.2    |
| 30               | 7.91 | 74.8    | 30     | 6.31 | 73.2    | 30              | 14.06 | 78.4    | 30     | 13.02 | 77      |
| 40               | 7.65 | 75      | 40     | 6.14 | 73.5    | 40              | 14.36 | 79.4    | 40     | 12.84 | 77.8    |
| 50               | 7.04 | 76.3    | 50     | 6.12 | 73.8    | 50              | 13.62 | 80.3    | 50     | 12.65 | 78.5    |
| 60               | 7.16 | 76.8    | 60     | 6.17 | 74.3    | 60              | 13.68 | 81.2    | 60     | 12.4  | 79.4    |
| 70               | 7.04 | 77.4    | 70     | 6.28 | 74.5    | 70              | 12.8  | 82.2    | 70     | 12.2  | 80.3    |
| 80               | 7.28 | 78.2    | 80     | 6.05 | 74.7    | 80              | 13.33 | 83.1    | 80     | 12.19 | 80.9    |
| 90               | 6.54 | 78.8    | 90     | 6.22 | 75.2    | 90              | 12.65 | 83.8    | 90     | 12.07 | 81.8    |
| 100              | 7.07 | 79.3    | 100    | 5.85 | 75.3    | 100             | 12.28 | 84.8    | 100    | 11.64 | 82.7    |
| 110              | 6.38 | 79.9    | 110    | 5.98 | 75.4    | 110             | 10.58 | 85.8    | 110    | 11.6  | 83.5    |
| 120              | 6.78 | 80.7    | 120    | 5.98 | 76      | 120             | 11.58 | 86.5    | 120    | 11.52 | 84.2    |
| 130              | 6.8  | 81.4    | 130    | 5.07 | 76.1    | 130             | 12.59 | 87.5    | 130    | 11.06 | 85.1    |
| 140              | 6.89 | 81.8    | 140    | 5.4  | 76.5    | 140             | 11.88 | 88.3    | 140    | 11    | 85.8    |

**Table S2.** Flux and feed solution conductivity for the experiments with NaCl draw solution with ultrasound. Notes: Time in min, flux in L/m<sup>2</sup>.h, and conductivity of feed solution (Cond FS) in mS/cm

| Case: 0.25-C-AL |  |  |        |  |  | Case: 1.0-C-AL |  |  |        |  |  |
|-----------------|--|--|--------|--|--|----------------|--|--|--------|--|--|
| Run #1          |  |  | Run #2 |  |  | Run #1         |  |  | Run #2 |  |  |

| Time | Flux  | Cond FS |
|------|-------|---------|------|-------|---------|------|-------|---------|------|-------|---------|
| 20   | 10.62 | 75.2    | 20   | 12.22 | 76.7    | 20   | 15.63 | 72.7    | 20   | 17.21 | 77.9    |
| 30   | 10.62 | 76.3    | 30   | 12.12 | 78.4    | 30   | 16.41 | 73.6    | 30   | 16.07 | 78.6    |
| 40   | 10.6  | 77.8    | 40   | 12.21 | 79.1    | 40   | 15.4  | 74.5    | 40   | 15.84 | 79.8    |
| 50   | 11.12 | 78.3    | 50   | 9.68  | 79.7    | 50   | 14.3  | 75.6    | 50   | 17.68 | 80.5    |
| 60   | 10.47 | 79.5    | 60   | 12.83 | 80.5    | 60   | 15.77 | 76.3    | 60   | 15.47 | 81.8    |
| 70   | 10.37 | 80.1    | 70   | 11.62 | 81.3    | 70   | 14.78 | 77.2    | 70   | 15.06 | 83      |
| 80   | 9.99  | 80.5    | 80   | 12.46 | 81.9    | 80   | 14.42 | 78.4    | 80   | 15.51 | 84.2    |
| 90   | 9.8   | 81.2    | 90   | 11.26 | 82.7    | 90   | 14.05 | 79.1    | 90   | 14.43 | 84.9    |
| 100  | 6.83  | 82.1    | 100  | 10.77 | 83.9    | 100  | 14.17 | 80.2    | 100  | 14.25 | 86.1    |
| 110  | 10.02 | 82.7    | 110  | 9.69  | 84.5    | 110  | 15.77 | 81.3    | 110  | 14.51 | 87.3    |
| 120  | 10.22 | 83.8    | 120  | 10.64 | 84.9    | 120  | 12.07 | 82.2    | 120  | 14.43 | 88.2    |
| 130  | 9.99  | 84.3    | 130  | 10.78 | 86.1    | 130  | 13.93 | 83.2    | 130  | 14.86 | 89.6    |
| 140  | 9.48  | 85      | 140  | 10.77 | 86.6    | 140  | 13.31 | 83.9    | 140  | 13.84 | 90.3    |

| Case: 0.25-CC-AL |       |         |        |       |         | Case: 1.0-CC-AL |       |         |        |       |         |
|------------------|-------|---------|--------|-------|---------|-----------------|-------|---------|--------|-------|---------|
| Run #1           |       |         | Run #2 |       |         | Run #1          |       |         | Run #2 |       |         |
| Time             | Flux  | Cond FS | Time   | Flux  | Cond FS | Time            | Flux  | Cond FS | Time   | Flux  | Cond FS |
| 20               | 13.41 | 72.8    | 20     | 12.1  | 75.4    | 20              | 16.42 | 78.3    | 20     | 17.07 | 77.4    |
| 30               | 13.09 | 73.7    | 30     | 12.1  | 76.4    | 30              | 16.42 | 79.2    | 30     | 16.69 | 78.3    |
| 40               | 12.83 | 74.5    | 40     | 13.21 | 76.9    | 40              | 16.32 | 80.3    | 40     | 17.16 | 79.4    |
| 50               | 12.22 | 75.3    | 50     | 10    | 77.8    | 50              | 15.83 | 81.2    | 50     | 15.88 | 80.4    |
| 60               | 11.6  | 76.1    | 60     | 11.36 | 79      | 60              | 15.4  | 82.3    | 60     | 16.06 | 81.5    |
| 70               | 11.52 | 76.7    | 70     | 12.54 | 79.8    | 70              | 14.93 | 83.4    | 70     | 15.8  | 82.6    |
| 80               | 7.3   | 77.5    | 80     | 12.15 | 80.7    | 80              | 14.94 | 84.5    | 80     | 15.84 | 83.7    |
| 90               | 9.35  | 78.2    | 90     | 9.63  | 81.3    | 90              | 14.81 | 85.5    | 90     | 14.93 | 84.8    |
| 100              | 11.98 | 79.1    | 100    | 11.85 | 82.1    | 100             | 14.56 | 86.6    | 100    | 14.85 | 86      |
| 110              | 10.49 | 79.9    | 110    | 7.46  | 82.8    | 110             | 14.32 | 87.7    | 110    | 14.68 | 87.1    |
| 120              | 10.86 | 80.5    | 120    | 11.8  | 83.6    | 120             | 13.69 | 88.8    | 120    | 14.06 | 88.2    |
| 130              | 10.86 | 81.2    | 130    | 10.74 | 84.3    | 130             | 14.31 | 89.8    | 130    | 13.59 | 89.2    |
| 140              | 10.47 | 82.1    | 140    | 10.79 | 85.1    | 140             | 13.19 | 90.9    | 140    | 12.48 | 90.6    |

| Case: 0.25-C-SL |      |         |        |      |         | Case: 1.0-C-SL |       |         |        |       |         |
|-----------------|------|---------|--------|------|---------|----------------|-------|---------|--------|-------|---------|
| Run #1          |      |         | Run #2 |      |         | Run #1         |       |         | Run #2 |       |         |
| Time            | Flux | Cond FS | Time   | Flux | Cond FS | Time           | Flux  | Cond FS | Time   | Flux  | Cond FS |
| 20              | 8.4  | 72      | 20     | 5.43 | 72.2    | 20             | 14.52 | 74.8    | 20     | 14.46 | 77.3    |
| 30              | 6.3  | 72.4    | 30     | 5.06 | 72.4    | 30             | 14.26 | 75.5    | 30     | 14.69 | 78.5    |
| 40              | 9.14 | 72.8    | 40     | 5.06 | 72.7    | 40             | 14.07 | 76.6    | 40     | 13.44 | 79.2    |
| 50              | 5.56 | 72.9    | 50     | 3.83 | 72.8    | 50             | 13.6  | 77.5    | 50     | 15.81 | 80.1    |
| 60              | 6.17 | 73.5    | 60     | 4.32 | 73      | 60             | 14.07 | 78.6    | 60     | 14.2  | 80.9    |
| 70              | 4.07 | 73.7    | 70     | 3.95 | 73.5    | 70             | 12.21 | 79.1    | 70     | 13.83 | 82.1    |
| 80              | 5.06 | 74.2    | 80     | 3.83 | 73.7    | 80             | 12.81 | 80.2    | 80     | 13.81 | 83.1    |
| 90              | 5.06 | 74.5    | 90     | 4.81 | 73.9    | 90             | 13.6  | 80.9    | 90     | 13.53 | 83.8    |
| 100             | 4.69 | 74.9    | 100    | 3.21 | 74.2    | 100            | 12.46 | 81.7    | 100    | 12.89 | 84.8    |
| 110             | 4.99 | 75      | 110    | 4.44 | 74.5    | 110            | 12.21 | 82.7    | 110    | 13.16 | 85.8    |
| 120             | 5.14 | 75.3    | 120    | 3.7  | 74.8    | 120            | 11.09 | 83      | 120    | 12.09 | 86.6    |
| 130             | 4.37 | 75.4    | 130    | 3.94 | 74.9    | 130            | 11.27 | 83.7    | 130    | 12.53 | 87.6    |
| 140             | 5.04 | 75.5    | 140    | 4.58 | 75.2    | 140            | 10.54 | 84.3    | 140    | 12.1  | 88.5    |

| Case: 0.25-CC-SL |      |         |        |      |         | Case: 1.0-CC-SL |       |         |        |       |         |
|------------------|------|---------|--------|------|---------|-----------------|-------|---------|--------|-------|---------|
| Run #1           |      |         | Run #2 |      |         | Run #1          |       |         | Run #2 |       |         |
| Time             | Flux | Cond FS | Time   | Flux | Cond FS | Time            | Flux  | Cond FS | Time   | Flux  | Cond FS |
| 20               | 4.94 | 71.9    | 20     | 5.31 | 70.8    | 20              | 14.94 | 76.9    | 20     | 15.43 | 74.9    |
| 30               | 5.19 | 72.3    | 30     | 4.57 | 71.1    | 30              | 16.17 | 78      | 30     | 14.89 | 75.7    |
| 40               | 3.95 | 72.7    | 40     | 7.41 | 71.5    | 40              | 16.05 | 78.8    | 40     | 14.26 | 76.6    |
| 50               | 6.91 | 73.2    | 50     | 6.65 | 71.7    | 50              | 14.07 | 79.7    | 50     | 13.81 | 77.5    |
| 60               | 6.17 | 73.3    | 60     | 8.28 | 72      | 60              | 14.44 | 80.7    | 60     | 13.86 | 78.5    |
| 70               | 4.57 | 73.7    | 70     | 6.42 | 72.4    | 70              | 14.69 | 81.6    | 70     | 13.6  | 79.4    |
| 80               | 3.09 | 73.8    | 80     | 6.67 | 72.9    | 80              | 13.83 | 82.6    | 80     | 13.35 | 80.3    |
| 90               | 5.31 | 74.1    | 90     | 6.37 | 73.2    | 90              | 12.1  | 83.3    | 90     | 13.54 | 81.1    |
| 100              | 4.32 | 74.4    | 100    | 6.72 | 73.7    | 100             | 13.58 | 84.4    | 100    | 13.06 | 82.2    |
| 110              | 3.81 | 74.8    | 110    | 5.05 | 74.1    | 110             | 13.83 | 85.3    | 110    | 12.54 | 83.1    |
| 120              | 4.83 | 75.1    | 120    | 6.06 | 74.5    | 120             | 12.47 | 86.2    | 120    | 12.44 | 84      |
| 130              | 5.19 | 75.4    | 130    | 6.17 | 74.9    | 130             | 12.22 | 87.2    | 130    | 14.64 | 84.8    |
| 140              | 4.8  | 75.7    | 140    | 7.56 | 75.3    | 140             | 12.35 | 88.2    | 140    | 10.7  | 85.8    |

**Table S3.** Flux and feed solution conductivity for the experiments with MgCl<sub>2</sub> draw solution without ultrasound. Notes: Time in min, flux in L/m<sup>2</sup>.h, and conductivity of feed solution (Cond FS) in mS/cm.

| Case: 0.25-C-BL |      |         |        |      |         | Case: 1.0-C-BL |       |         |        |       |         |
|-----------------|------|---------|--------|------|---------|----------------|-------|---------|--------|-------|---------|
| Run #1          |      |         | Run #2 |      |         | Run #1         |       |         | Run #2 |       |         |
| Time            | Flux | Cond FS | Time   | Flux | Cond FS | Time           | Flux  | Cond FS | Time   | Flux  | Cond FS |
| 20              | 3.06 | 72.6    | 20     | 5.14 | 72.7    | 20             | 11.62 | 73      | 20     | 10.41 | 75.9    |
| 30              | 3.68 | 72.9    | 30     | 5.07 | 73      | 30             | 11.67 | 73.6    | 30     | 10.21 | 76.6    |
| 40              | 4.15 | 73.1    | 40     | 5.2  | 73.4    | 40             | 11.59 | 74.1    | 40     | 10.15 | 77.1    |
| 50              | 4.38 | 73.4    | 50     | 5.22 | 73.7    | 50             | 11.42 | 74.8    | 50     | 10.15 | 77.6    |
| 60              | 4.86 | 73.7    | 60     | 5.06 | 73.9    | 60             | 11.38 | 75.5    | 60     | 9.6   | 78.3    |
| 70              | 3.8  | 73.9    | 70     | 5.02 | 74.3    | 70             | 11.32 | 76.2    | 70     | 9.93  | 78.8    |
| 80              | 3.47 | 74      | 80     | 4.75 | 74.5    | 80             | 11.48 | 77      | 80     | 9.72  | 79.4    |
| 90              | 3.54 | 74.2    | 90     | 4.89 | 74.8    | 90             | 10.86 | 77.5    | 90     | 9.74  | 80.1    |
| 100             | 3.51 | 74.4    | 100    | 4.8  | 75      | 100            | 10.68 | 78.1    | 100    | 8.89  | 80.7    |
| 110             | 3.84 | 74.6    | 110    | 4.7  | 75.3    | 110            | 10.65 | 78.8    | 110    | 9.36  | 81.2    |
| 120             | 3.72 | 74.9    | 120    | 4.49 | 75.6    | 120            | 10.42 | 79.4    | 120    | 9     | 82      |
| 130             | 3.64 | 75.1    | 130    | 4.49 | 75.8    | 130            | 10.43 | 80.1    | 130    | 8.93  | 82.5    |
| 140             | 3.95 | 75.4    | 140    | 4.28 | 76.1    | 140            | 10.02 | 80.7    | 140    | 8.75  | 82.9    |

| Case: 0.25-CC-BL |      |         |        |      |         | Case: 1.0-CC-BL |       |         |        |       |         |
|------------------|------|---------|--------|------|---------|-----------------|-------|---------|--------|-------|---------|
| Run #1           |      |         | Run #2 |      |         | Run #1          |       |         | Run #2 |       |         |
| Time             | Flux | Cond FS | Time   | Flux | Cond FS | Time            | Flux  | Cond FS | Time   | Flux  | Cond FS |
| 20               | 5.38 | 74.4    | 20     | 5.79 | 74.9    | 20              | 10.3  | 75.7    | 20     | 10.46 | 75.4    |
| 30               | 5.15 | 74.7    | 30     | 5.59 | 75.2    | 30              | 10.48 | 76.5    | 30     | 10.21 | 76      |
| 40               | 4.86 | 75.1    | 40     | 5.48 | 75.5    | 40              | 10.4  | 77      | 40     | 9.85  | 76.5    |
| 50               | 5.05 | 75.4    | 50     | 5.53 | 75.8    | 50              | 10.42 | 77.5    | 50     | 10.22 | 77.3    |
| 60               | 5.05 | 75.8    | 60     | 5.54 | 76.1    | 60              | 10.2  | 78.1    | 60     | 9.83  | 77.7    |
| 70               | 4.7  | 76.1    | 70     | 5.28 | 76.4    | 70              | 9.88  | 78.8    | 70     | 9.46  | 78.3    |
| 80               | 4.72 | 76.3    | 80     | 5.41 | 76.7    | 80              | 9.85  | 79.4    | 80     | 9.49  | 79      |
| 90               | 4.69 | 76.6    | 90     | 5.3  | 77      | 90              | 10.1  | 80.1    | 90     | 9.58  | 79.5    |
| 100              | 4.62 | 76.9    | 100    | 5.41 | 77.3    | 100             | 9.7   | 80.8    | 100    | 9.2   | 80.1    |
| 110              | 4.8  | 77.2    | 110    | 5.17 | 77.5    | 110             | 9.37  | 81.3    | 110    | 9.26  | 80.8    |
| 120              | 4.65 | 77.5    | 120    | 4.94 | 77.7    | 120             | 9.14  | 82      | 120    | 9.09  | 81.2    |
| 130              | 4.89 | 77.8    | 130    | 4.62 | 78      | 130             | 9.19  | 82.5    | 130    | 9.04  | 81.9    |
| 140              | 4.74 | 78      | 140    | 4.63 | 78.2    | 140             | 9.11  | 82.9    | 140    | 8.65  | 82.3    |

**Table S4.** Flux and feed solution conductivity for the experiments with MgCl<sub>2</sub> draw solution with ultrasound. Notes: Time in min, flux in L/m<sup>2</sup>.h, and conductivity of feed solution (Cond FS) in mS/cm

| Case: 0.25-C-AL |      |         |        |      |         | Case: 1.0-C-AL |       |         |        |       |         |
|-----------------|------|---------|--------|------|---------|----------------|-------|---------|--------|-------|---------|
| Run #1          |      |         | Run #2 |      |         | Run #1         |       |         | Run #2 |       |         |
| Time            | Flux | Cond FS | Time   | Flux | Cond FS | Time           | Flux  | Cond FS | Time   | Flux  | Cond FS |
| 20              | 7.53 | 73.6    | 20     | 9.25 | 74.2    | 20             | 11.72 | 76.1    | 20     | 11.44 | 76      |
| 30              | 6.98 | 74      | 30     | 8.54 | 74.5    | 30             | 12.3  | 76.6    | 30     | 10.75 | 76.7    |
| 40              | 6.7  | 74.7    | 40     | 8.07 | 74.8    | 40             | 11.95 | 77.7    | 40     | 10.72 | 77.2    |
| 50              | 6.63 | 75.1    | 50     | 7.93 | 75.4    | 50             | 12.09 | 78.2    | 50     | 10.52 | 77.8    |
| 60              | 6.74 | 75.5    | 60     | 7.95 | 76.3    | 60             | 11.25 | 78.9    | 60     | 10.21 | 78.5    |
| 70              | 6.84 | 75.8    | 70     | 8.07 | 76.7    | 70             | 11.42 | 79.6    | 70     | 10.49 | 79.2    |
| 80              | 6.53 | 76.2    | 80     | 8    | 77      | 80             | 11.09 | 80.2    | 80     | 9.96  | 79.7    |
| 90              | 6.4  | 76.6    | 90     | 7.52 | 77.7    | 90             | 11.26 | 80.9    | 90     | 9.83  | 80.4    |
| 100             | 6.3  | 77.1    | 100    | 7.69 | 78.1    | 100            | 11.42 | 81.5    | 100    | 9.85  | 81.1    |
| 110             | 6.23 | 77.5    | 110    | 0.44 | 78.6    | 110            | 10.93 | 82.2    | 110    | 9.99  | 81.8    |
| 120             | 6.51 | 77.8    | 120    | 7.64 | 78.9    | 120            | 10.86 | 83.1    | 120    | 10.05 | 82.4    |
| 130             | 6.57 | 78.2    | 130    | 7.54 | 79.4    | 130            | 10.86 | 83.8    | 130    | 9.36  | 82.9    |
| 140             | 6.31 | 78.7    | 140    | 7.52 | 79.8    | 140            | 10.44 | 84.4    | 140    | 9.27  | 83.4    |

| Case: 0.25-CC-AL |      |         |        |      |         | Case: 1.0-CC-AL |       |         |        |       |         |
|------------------|------|---------|--------|------|---------|-----------------|-------|---------|--------|-------|---------|
| Run #1           |      |         | Run #2 |      |         | Run #1          |       |         | Run #2 |       |         |
| Time             | Flux | Cond FS | Time   | Flux | Cond FS | Time            | Flux  | Cond FS | Time   | Flux  | Cond FS |
| 20               | 8.41 | 75.4    | 20     | 9.36 | 75.7    | 20              | 10.56 | 75.6    | 20     | 10.72 | 75.8    |
| 30               | 8.46 | 75.9    | 30     | 8.78 | 76.1    | 30              | 10.57 | 76.3    | 30     | 10.7  | 76.6    |
| 40               | 9.58 | 76.4    | 40     | 8.44 | 76.5    | 40              | 10.62 | 77      | 40     | 10.04 | 77.1    |
| 50               | 6.69 | 76.8    | 50     | 8.31 | 77      | 50              | 10.58 | 77.6    | 50     | 9.93  | 77.9    |
| 60               | 8.32 | 77.2    | 60     | 8.48 | 77.7    | 60              | 10.22 | 78.2    | 60     | 10.49 | 78.4    |
| 70               | 8.15 | 77.8    | 70     | 8.02 | 78.1    | 70              | 10.1  | 78.9    | 70     | 9.7   | 79      |
| 80               | 7.9  | 78.3    | 80     | 7.83 | 78.8    | 80              | 10.02 | 79.6    | 80     | 10.02 | 79.4    |
| 90               | 7.79 | 78.8    | 90     | 7.65 | 79.4    | 90              | 10.15 | 80      | 90     | 9.77  | 80.1    |
| 100              | 7.88 | 79.2    | 100    | 7.77 | 79.8    | 100             | 10.05 | 80.7    | 100    | 9.32  | 80.7    |
| 110              | 7.67 | 79.7    | 110    | 7.91 | 80.2    | 110             | 9.89  | 81.4    | 110    | 9.47  | 81.2    |
| 120              | 7.43 | 80.3    | 120    | 7.73 | 80.7    | 120             | 9.53  | 81.9    | 120    | 9.23  | 81.9    |
| 130              | 7.57 | 80.6    | 130    | 7.64 | 81.2    | 130             | 10.01 | 82.7    | 130    | 9     | 82.6    |
| 140              | 7.33 | 81      | 140    | 7.59 | 81.8    | 140             | 9.64  | 83      | 140    | 8.99  | 82.7    |

| Case: 0.25-C-SL |      |         |        |      |         | Case: 1.0-C-SL |       |         |        |       |         |
|-----------------|------|---------|--------|------|---------|----------------|-------|---------|--------|-------|---------|
| Run #1          |      |         | Run #2 |      |         | Run #1         |       |         | Run #2 |       |         |
| Time            | Flux | Cond FS | Time   | Flux | Cond FS | Time           | Flux  | Cond FS | Time   | Flux  | Cond FS |
| 20              | 4.41 | 74.9    | 20     | 4.14 | 74.9    | 20             | 10.58 | 75.4    | 20     | 9.1   | 75.3    |
| 30              | 4.49 | 75.2    | 30     | 4.22 | 75.1    | 30             | 9.99  | 76.1    | 30     | 9.85  | 75.9    |
| 40              | 4.77 | 75.4    | 40     | 3.86 | 75.4    | 40             | 10.06 | 76.6    | 40     | 9.72  | 76.4    |
| 50              | 5.36 | 75.6    | 50     | 4.05 | 75.7    | 50             | 9.9   | 77.1    | 50     | 10.63 | 77.1    |
| 60              | 4.83 | 75.9    | 60     | 4.26 | 75.9    | 60             | 10.07 | 77.8    | 60     | 10.02 | 77.7    |
| 70              | 4.91 | 76.2    | 70     | 4.47 | 76.1    | 70             | 9.59  | 78.4    | 70     | 9.6   | 78.2    |
| 80              | 4.8  | 76.6    | 80     | 4.32 | 76.5    | 80             | 9.26  | 79.1    | 80     | 10.49 | 78.9    |
| 90              | 5.04 | 76.9    | 90     | 4.46 | 76.8    | 90             | 9.41  | 79.4    | 90     | 8.84  | 79.5    |
| 100             | 5.05 | 77      | 100    | 4.6  | 77      | 100            | 9.23  | 80.2    | 100    | 9.26  | 80      |
| 110             | 4.89 | 77.5    | 110    | 4.33 | 77.3    | 110            | 9.06  | 80.8    | 110    | 9.3   | 80.4    |
| 120             | 5.06 | 77.6    | 120    | 4.84 | 77.5    | 120            | 9.01  | 81.4    | 120    | 9.14  | 81      |
| 130             | 5.2  | 77.9    | 130    | 4.53 | 77.8    | 130            | 8.84  | 81.9    | 130    | 8.91  | 81.7    |
| 140             | 5.52 | 78.1    | 140    | 4.33 | 78.1    | 140            | 9.86  | 82.2    | 140    | 8.91  | 82.2    |

| Case: 0.25-CC-SL |      |         |        |      |         | Case: 1.0-CC-SL |       |         |        |      |         |
|------------------|------|---------|--------|------|---------|-----------------|-------|---------|--------|------|---------|
| Run #1           |      |         | Run #2 |      |         | Run #1          |       |         | Run #2 |      |         |
| Time             | Flux | Cond FS | Time   | Flux | Cond FS | Time            | Flux  | Cond FS | Time   | Flux | Cond FS |
| 20               | 5.59 | 74.5    | 20     | 5.84 | 74.6    | 20              | 10.04 | 75.2    | 20     | 8.98 | 75.6    |
| 30               | 6.19 | 74.8    | 30     | 5.99 | 75      | 30              | 11.53 | 76      | 30     | 8.9  | 76.2    |
| 40               | 5.59 | 75.1    | 40     | 5.67 | 75.5    | 40              | 9.57  | 76.7    | 40     | 8.75 | 76.7    |
| 50               | 5.51 | 75.4    | 50     | 6.15 | 75.9    | 50              | 9.95  | 77.4    | 50     | 9.04 | 77.2    |
| 60               | 5.44 | 75.8    | 60     | 5.84 | 76.2    | 60              | 10.27 | 77.7    | 60     | 9.1  | 77.8    |
| 70               | 5.23 | 76.1    | 70     | 5.86 | 76.5    | 70              | 9.72  | 78.4    | 70     | 9.09 | 78.2    |
| 80               | 5.38 | 76.4    | 80     | 5.62 | 76.9    | 80              | 10.07 | 79      | 80     | 8.86 | 78.8    |
| 90               | 5.58 | 76.6    | 90     | 5.99 | 77.2    | 90              | 10.06 | 79.7    | 90     | 8.83 | 79.7    |
| 100              | 5.12 | 77.1    | 100    | 5.94 | 77.8    | 100             | 9.53  | 80.3    | 100    | 8.94 | 80.2    |
| 110              | 5.62 | 77.3    | 110    | 5.47 | 78.2    | 110             | 8.91  | 80.9    | 110    | 8.8  | 80.5    |
| 120              | 5.28 | 77.5    | 120    | 5.8  | 78.6    | 120             | 9.4   | 81.5    | 120    | 8.54 | 81.1    |
| 130              | 5.93 | 77.8    | 130    | 5.32 | 78.9    | 130             | 9.15  | 82.2    | 130    | 8.2  | 81.8    |
| 140              | 4.46 | 78.2    | 140    | 5.32 | 79.4    | 140             | 9.14  | 82.6    | 140    | 8.28 | 82.2    |
